# Supplementary material for: Imidazole-directed fabrication of three polyoxovanadate-based copper frameworks as efficient catalysts for constructing C–N bonds
Source: Royal Society of Chemistry journal article supplement (doi:10.1039/d0dt02162h), 2020-01-01
Supplement: d0dt02162h1.pdf [file d0dt02162h1.pdf]

## Supporting Information

### Imidazole-Directed Fabrication of Three Polyoxovanadates-based Copper Frameworks as Efficient Catalysts for Constructing of C-N bonds

Xianqiang Huang,<sup>\*a</sup> Yuquan Qi,<sup>a</sup> Yuxiao Gu<sup>a</sup>, Shuwen Gong,<sup>\*a</sup> Guodong Shen,<sup>\*a</sup> Qiang Li,<sup>a</sup> Jikun Li<sup>\*b</sup>

#### Table of contents

1. Table S1 Crystallographic data for POVCFs 1- 3.
2. Figures S1 The FT-IR spectrum for POVCFs 1
3. Figures S2 The FT-IR spectrum for POVCFs 2
4. Figures S3 The FT-IR spectrum for POVCFs 3
5. Figures S4 The PXRD spectrum for POVCFs 1
6. Figures S5 The PXRD spectrum for POVCFs 2
7. Figures S6 The PXRD spectrum for POVCFs 3
8. Figure S7 The PXRD of POVCFs 1 before and after three runs reaction
9. Figure S8-23 The NMR spectra of the products

**Table 1. Crystallographic data for POVCFs 1-3**

|                                         | POVCFs 1                                                           | POVCFs 2                                                          | POVCFs 3                                                                         |
|-----------------------------------------|--------------------------------------------------------------------|-------------------------------------------------------------------|----------------------------------------------------------------------------------|
| Formula                                 | C <sub>24</sub> H <sub>39</sub> CuN <sub>8</sub> O <sub>11</sub> V | C <sub>12</sub> H <sub>20</sub> CuN <sub>4</sub> O <sub>6</sub> V | C <sub>48</sub> H <sub>80</sub> CuN <sub>16</sub> O <sub>28</sub> V <sub>1</sub> |
|                                         | 4                                                                  | 2                                                                 | 0                                                                                |
| $M_r$                                   | 882.93                                                             | 481.74                                                            | 1902.22                                                                          |
| Crystal system                          | triclinic                                                          | Monoclinic                                                        | orthorhombic                                                                     |
| Space group                             | <i>P-1</i>                                                         | <i>P21/c</i>                                                      | <i>Pccn</i>                                                                      |
| Temperature                             | 298(2)                                                             | 298(2) K                                                          | 293(2)K                                                                          |
| $a$ (Å)                                 | 11.2508(8)                                                         | 9.2616(7)                                                         | 21.7725(7)                                                                       |
| $b$ (Å)                                 | 11.9199(9)                                                         | 5.5433(4)                                                         | 21.9575(9)                                                                       |
| $c$ (Å)                                 | 15.2277(14)                                                        | 17.1092(11)                                                       | 14.8458(6)                                                                       |
| $\alpha$ (deg)                          | 105.431(2)                                                         | 90                                                                | 90                                                                               |
| $\beta$ (deg)                           | 94.1680(10)                                                        | 93.4420(10)                                                       | 90                                                                               |
| $\gamma$ (deg)                          | 108.872(2)                                                         | 90                                                                | 90                                                                               |
| $V$ (Å <sup>3</sup> )                   | 1834.3(3)                                                          | 876.80(11)                                                        | 7097.3(5)                                                                        |
| $Z$                                     | 2                                                                  | 2                                                                 | 4                                                                                |
| $D_{\text{calc}}$ (g cm <sup>-3</sup> ) | 1.599                                                              | 1.825                                                             | 1.780                                                                            |
| $F(000)$                                | 896                                                                | 486                                                               | 3852                                                                             |
| $R_1[I > 2\sigma(I)]$                   | 0.0611                                                             | 0.0400                                                            | 0.0650                                                                           |
| $wR_2[I > 2\sigma(I)]$                  | 0.1762                                                             | 0.1054                                                            | 0.1738                                                                           |
| $R_1(\text{all data})$                  | 0.0878                                                             | 0.0561                                                            | 0.0890                                                                           |
| $wR_2(\text{all data})$                 | 0.1938                                                             | 0.1136                                                            | 0.1946                                                                           |
| GOOF                                    | 1.049                                                              | 1.043                                                             | 1.040                                                                            |
| CCDC No.                                | 2009806                                                            | 2009807                                                           | 2009808                                                                          |

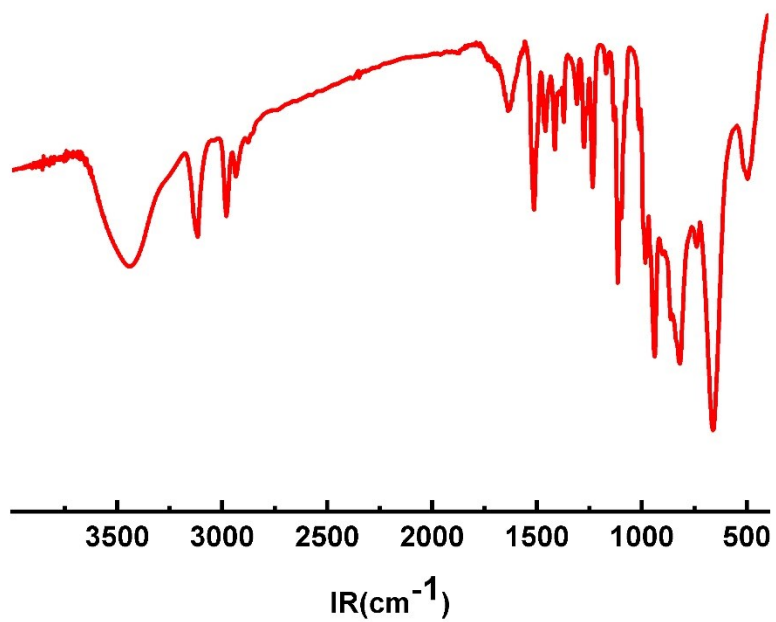

**Figure S1.** The IR spectrum of POVCFs 1

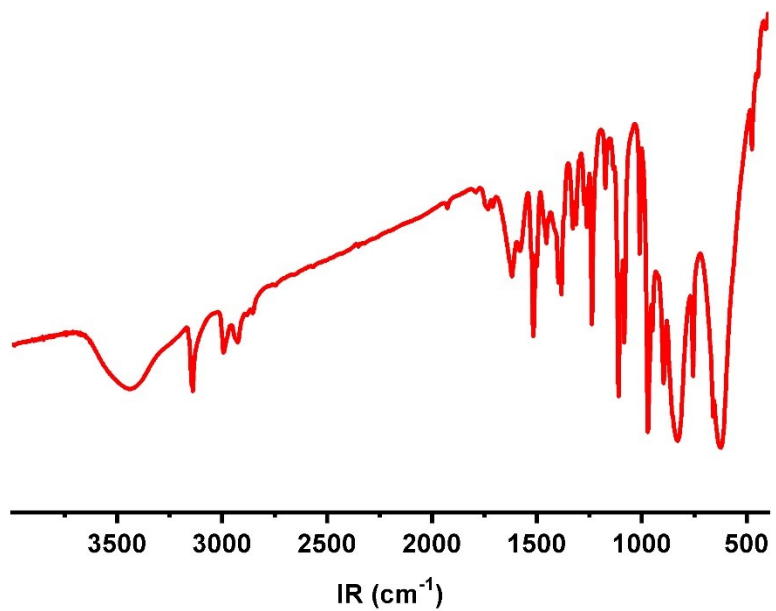

**Figure S2.** The IR spectrum of POVCFs 2

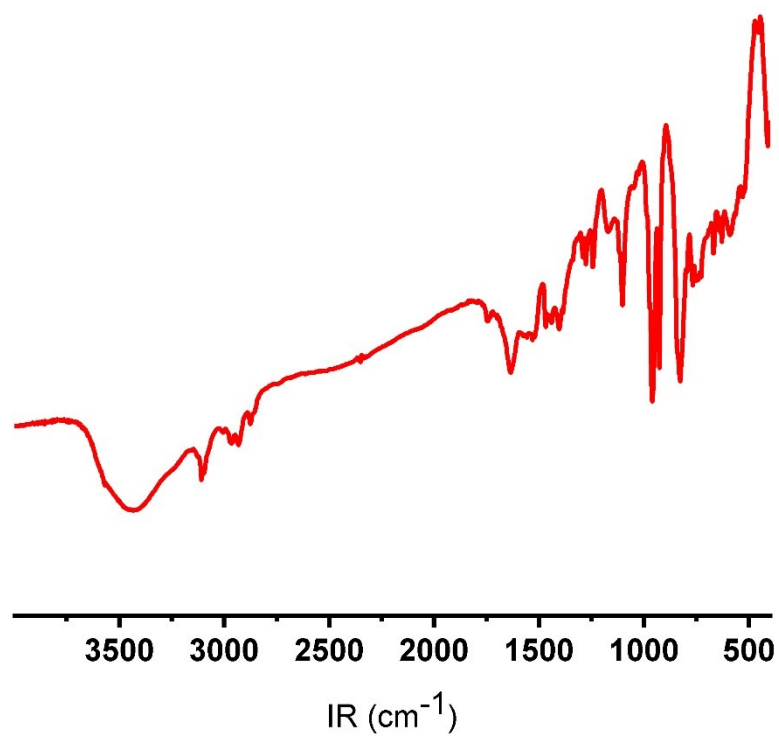

Figure S3. The IR spectrum of POVCFs 3

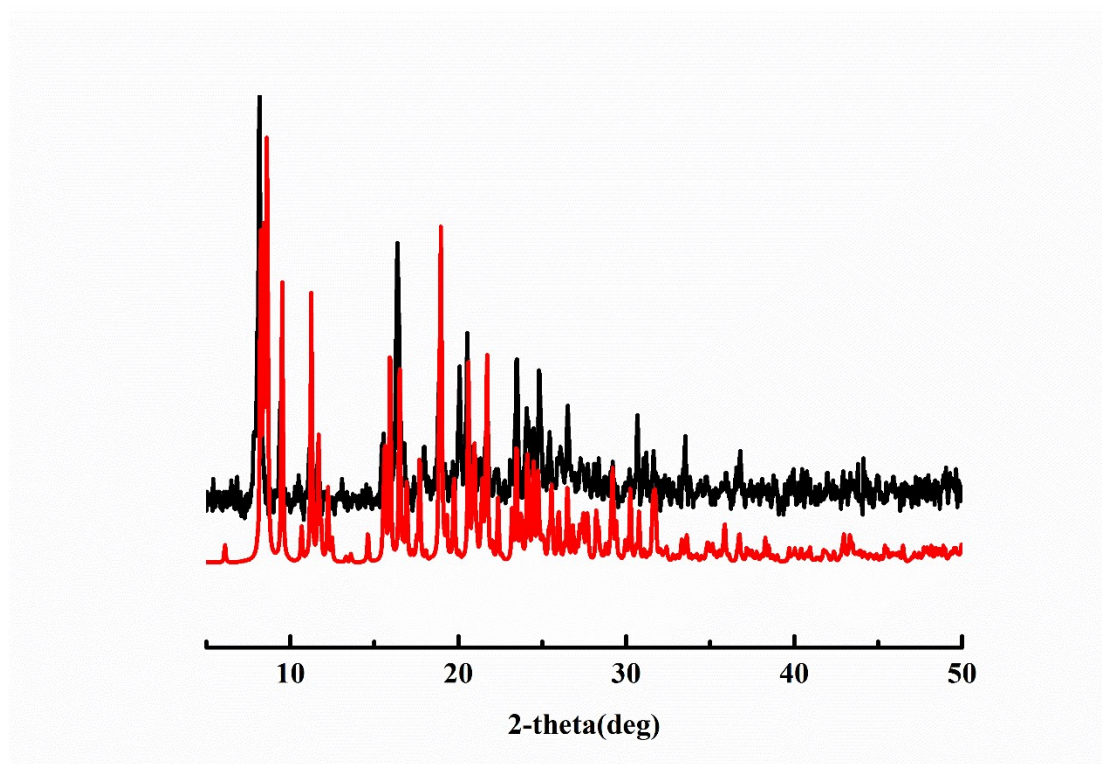

Figure S4. The PXRD spectrum of POVCFs 1

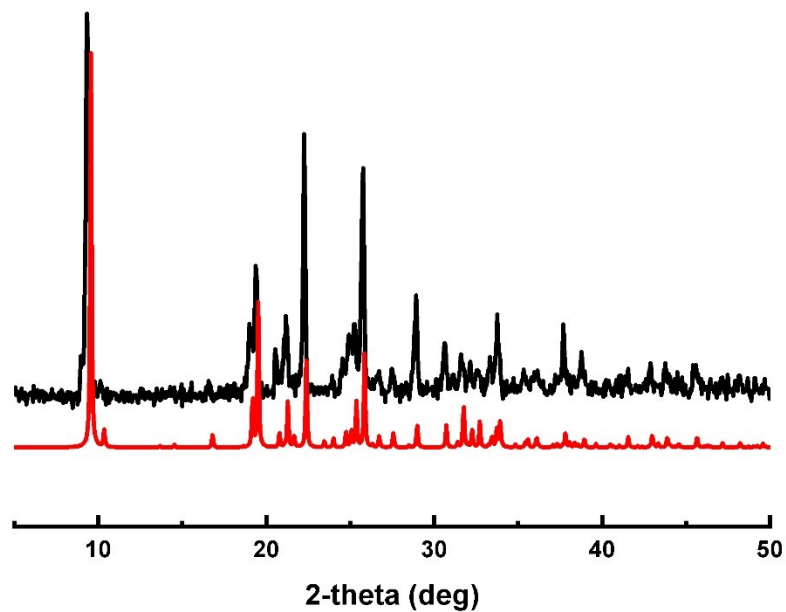

**Figure S5.** The PXRD spectrum of POVCFs 2

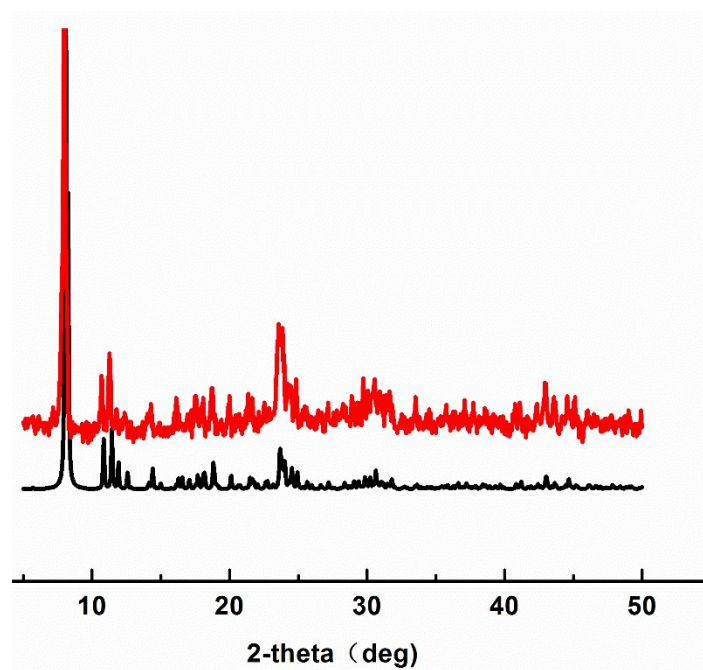

**Figure S6.** The PXRD spectrum of POVCFs 3

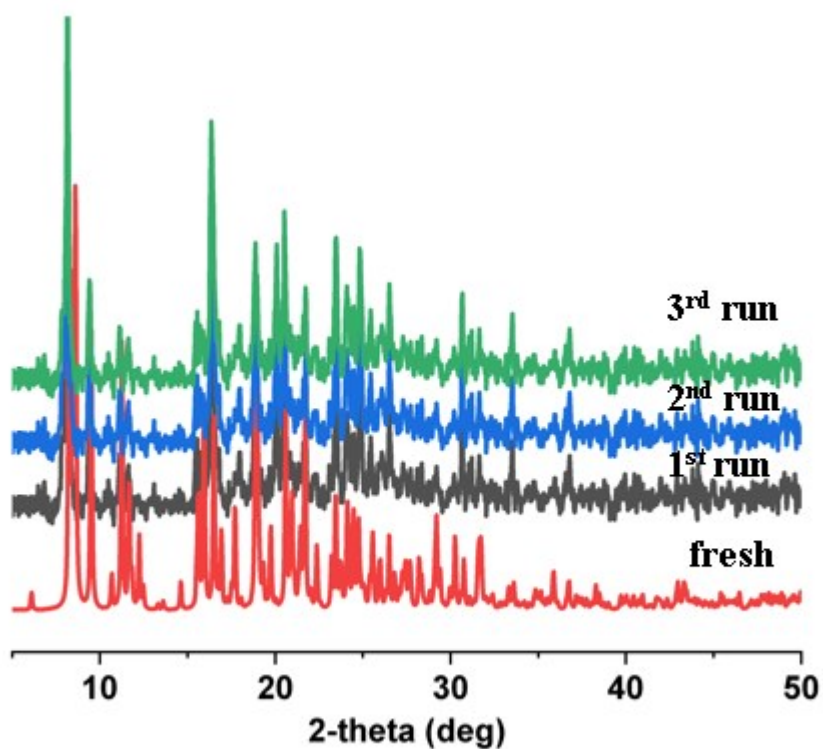

Figure S7. The powder XRD patterns of POVCFs 1 before and after three runs of reaction

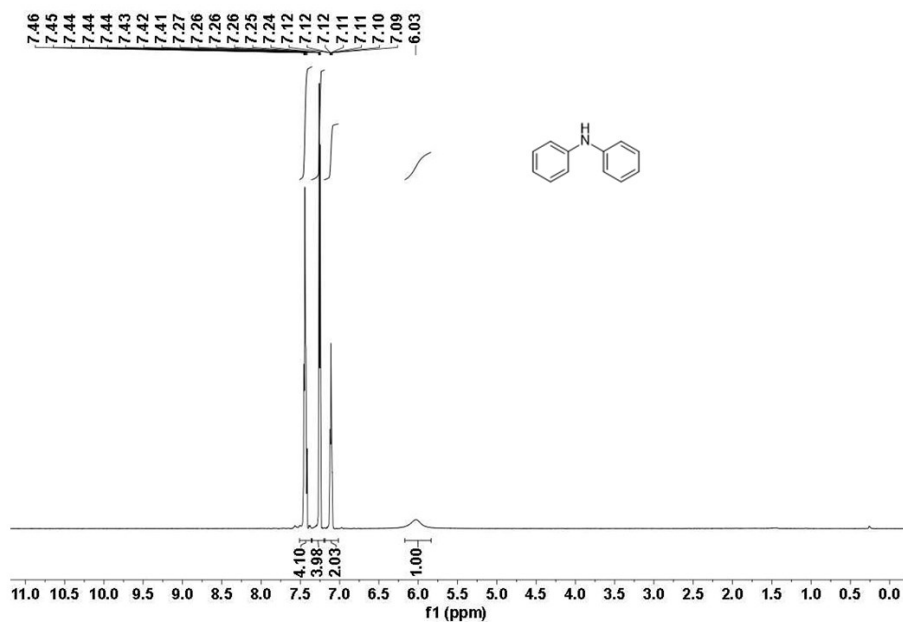

Figure S8  $^1\text{H}$  NMR spectrum of product 3a (entry 1) in  $\text{CDCl}_3$ .

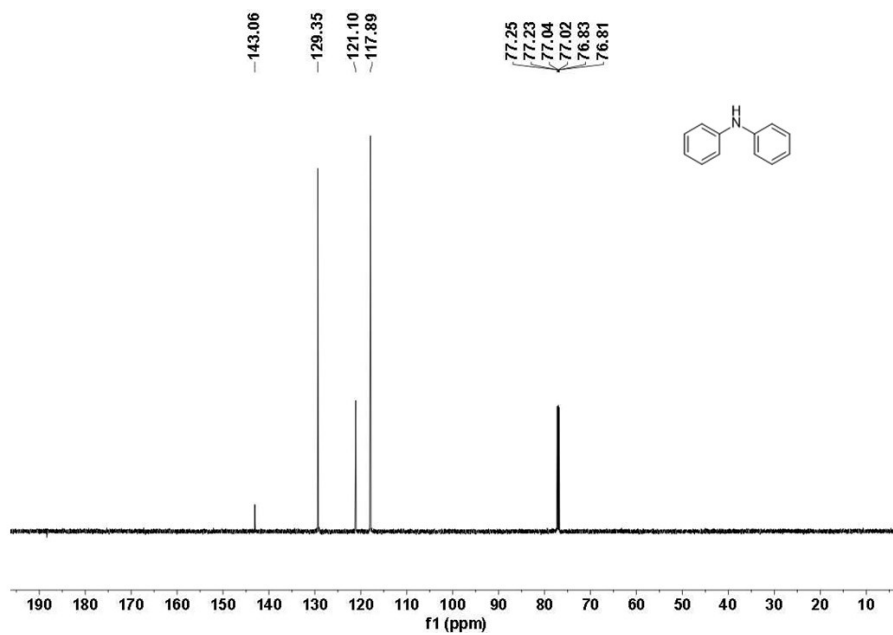

Figure S9  $^{13}\text{C}$  NMR spectrum of product 3a (entry 1) in  $\text{CDCl}_3$ .

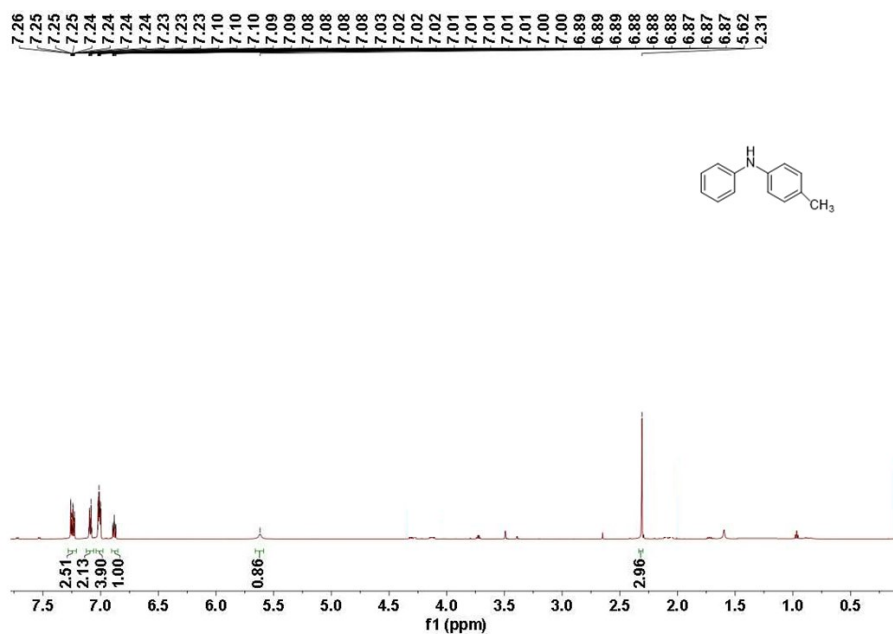

Figure S10  $^1\text{H}$  NMR spectrum of product 3b (entry 2) in  $\text{CDCl}_3$ .

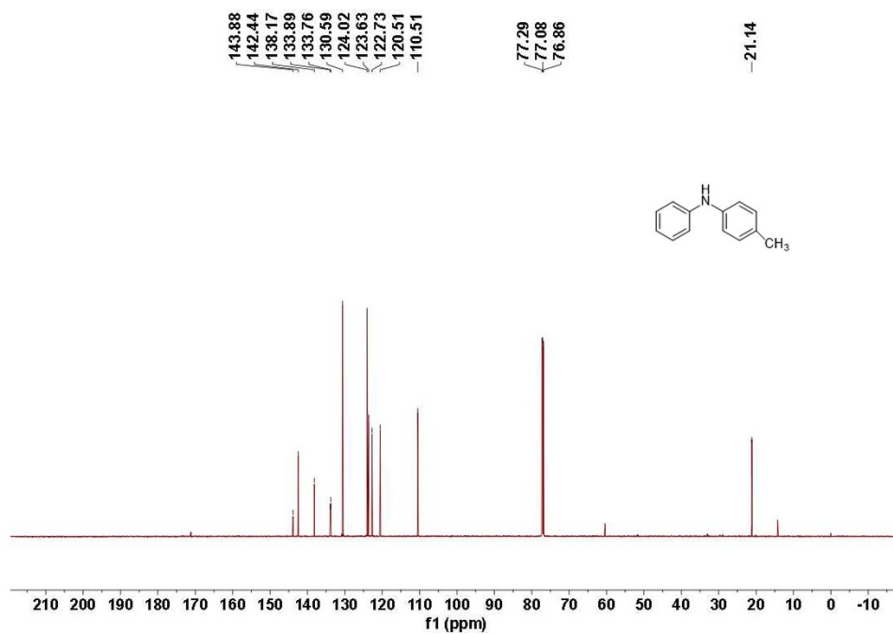

Figure S11 <sup>13</sup>C NMR spectrum of product 3b (entry 2) in CDCl<sub>3</sub>.

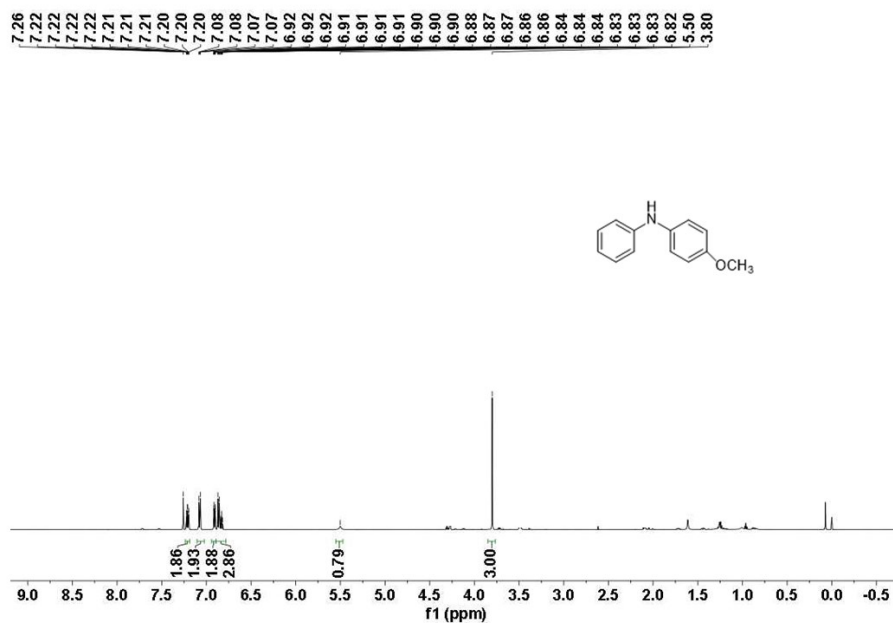

Figure S12 <sup>1</sup>H NMR spectrum of product 3c (entry 3) in CDCl<sub>3</sub>.



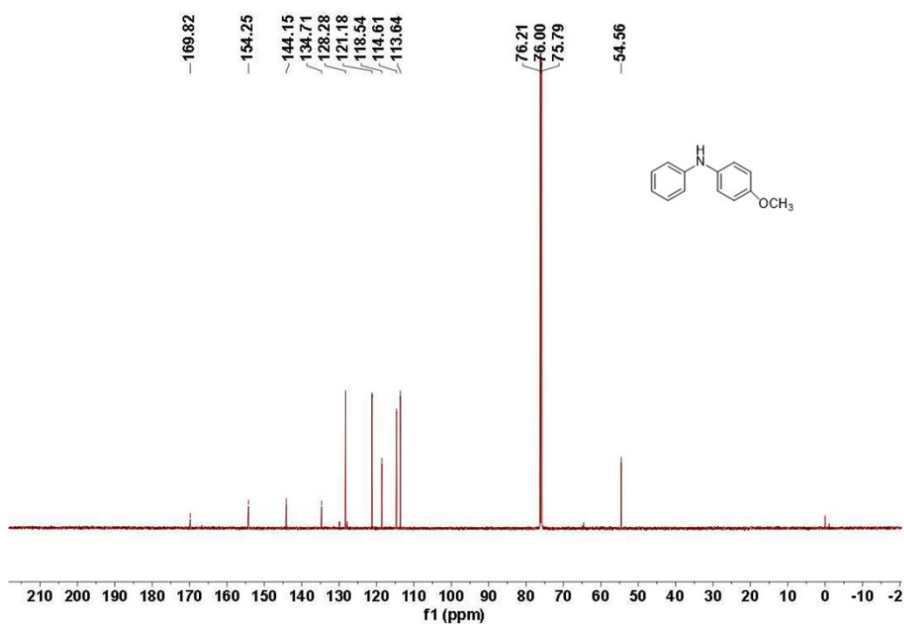

Figure S13  $^{13}\text{C}$  NMR spectrum of product 3c (entry 3) in  $\text{CDCl}_3$ .

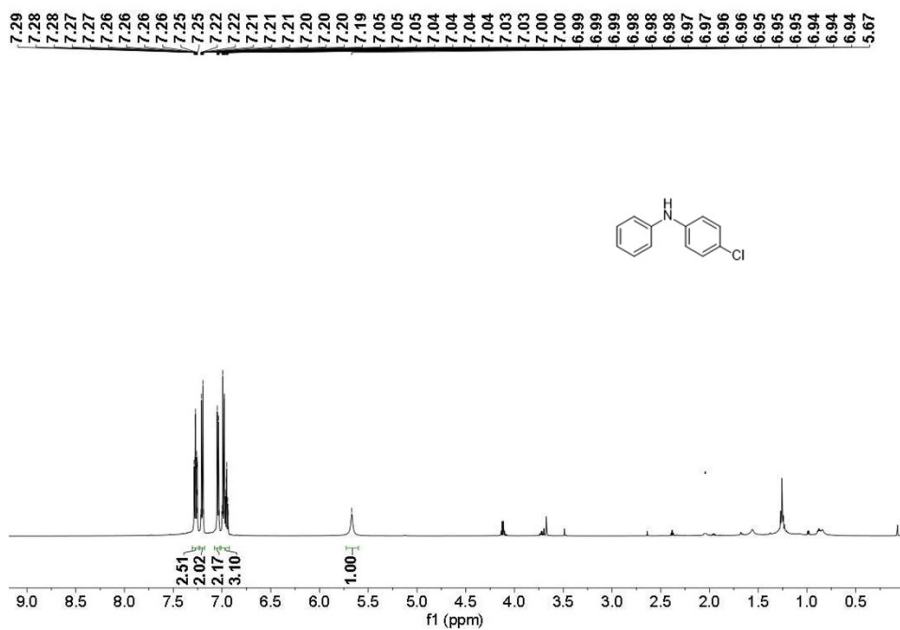

Figure S14  $^1\text{H}$  NMR spectrum of product 3d (entry 4) in  $\text{CDCl}_3$ .

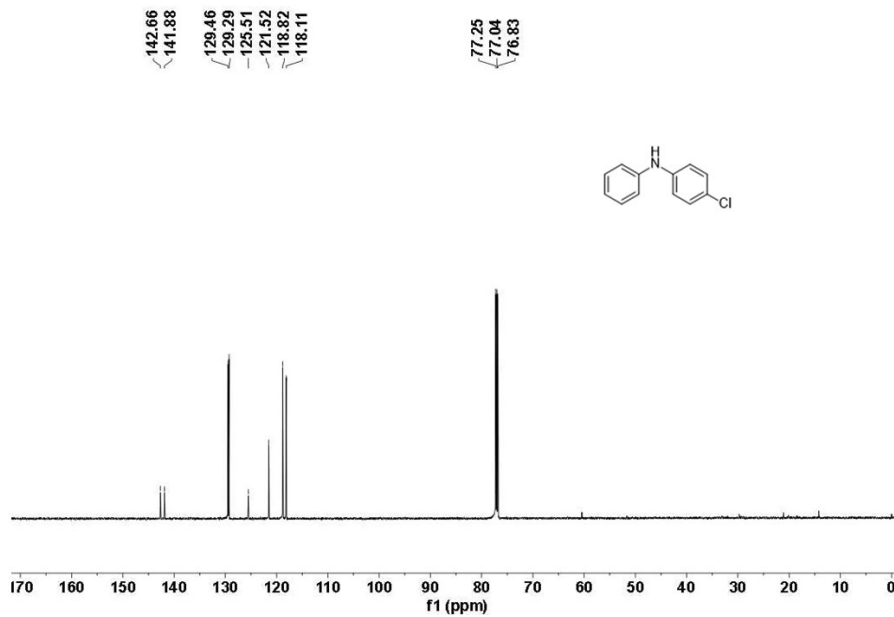

Figure S15 <sup>13</sup>C NMR spectrum of product 3d (entry 4) in CDCl<sub>3</sub>.

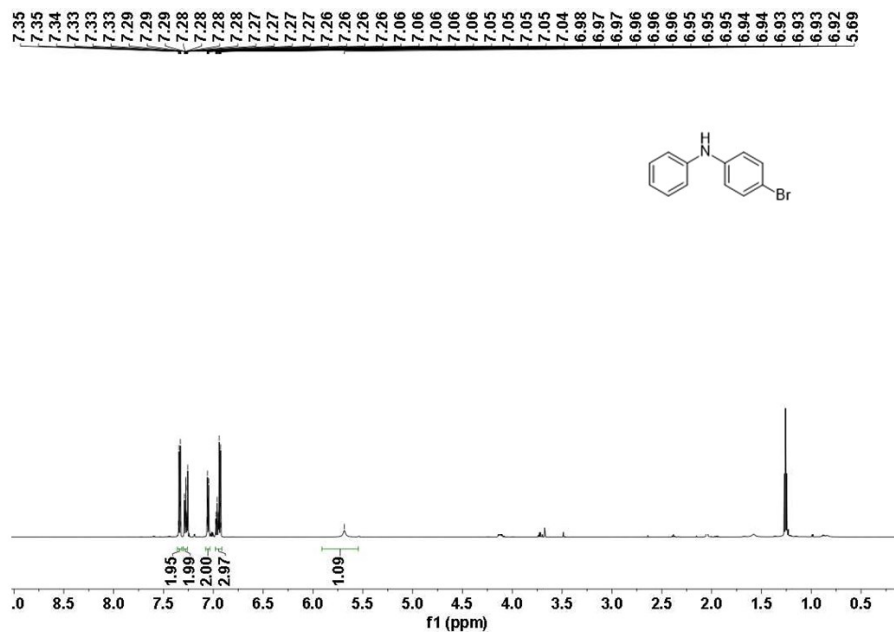

Figure S16 <sup>1</sup>H NMR spectrum of product 3e (entry 5) in CDCl<sub>3</sub>.

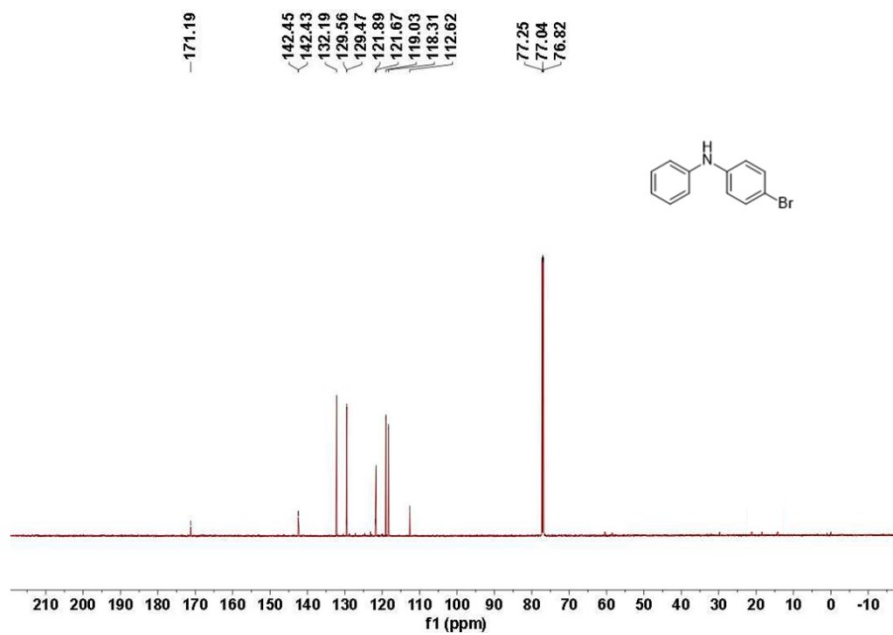

Figure S17 <sup>13</sup>C NMR spectrum of product 3e (entry 5) in CDCl<sub>3</sub>.

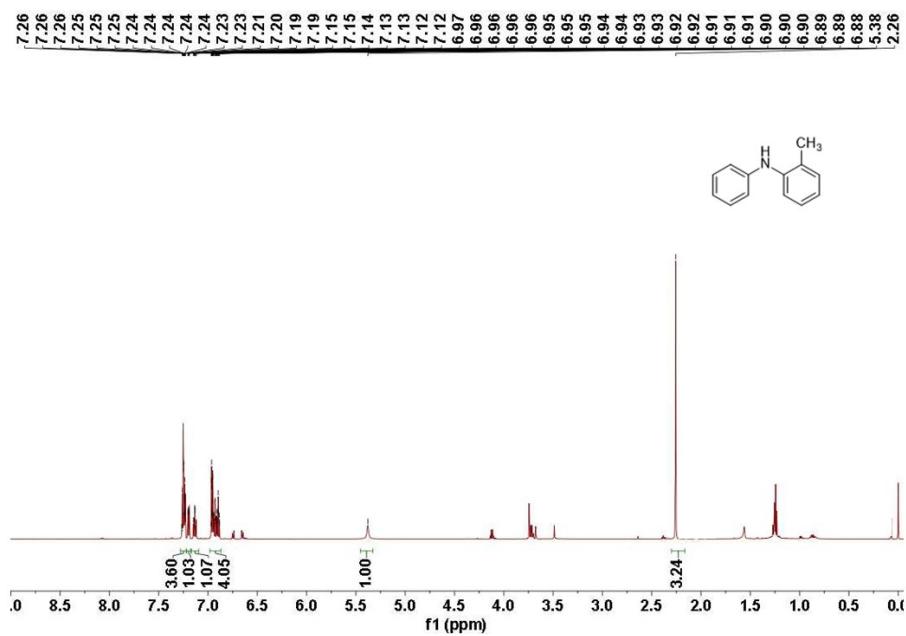

Figure S18 <sup>1</sup>H NMR spectrum of product 3f (entry 6) in CDCl<sub>3</sub>.

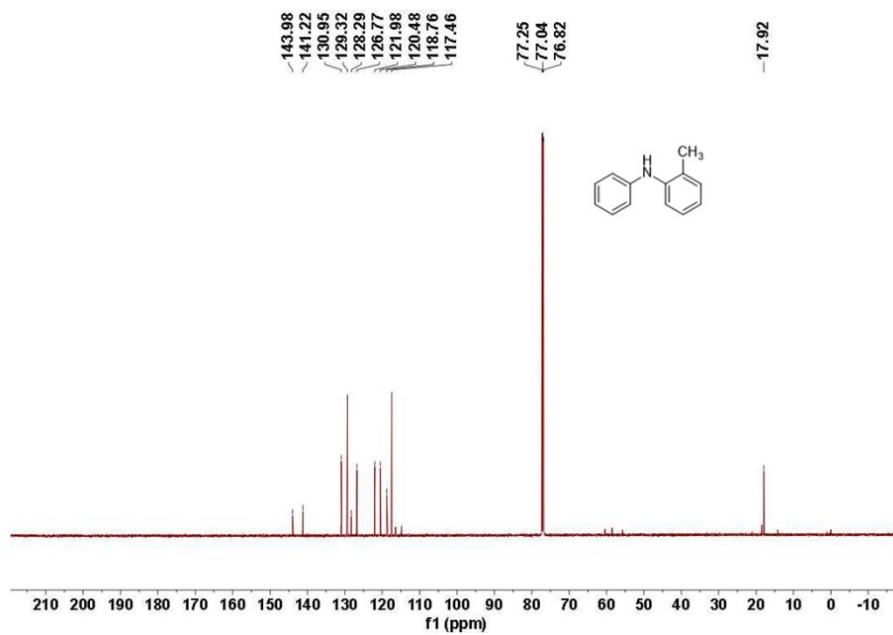

Figure S19  $^{13}\text{C}$  NMR spectrum of product 3f (entry 6) in  $\text{CDCl}_3$ .

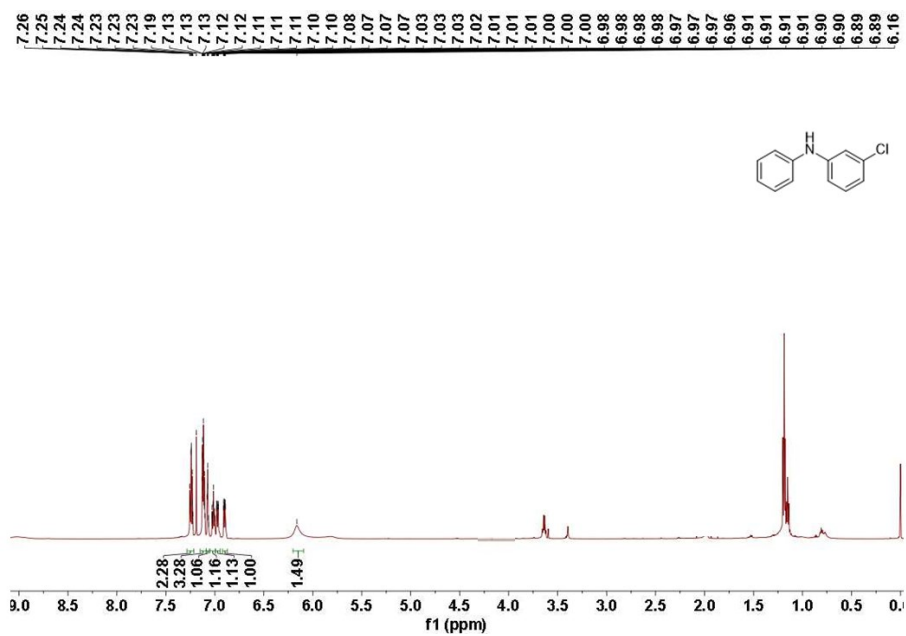

Figure S20  $^1\text{H}$  NMR spectrum of product 3g (entry 7) in  $\text{CDCl}_3$ .

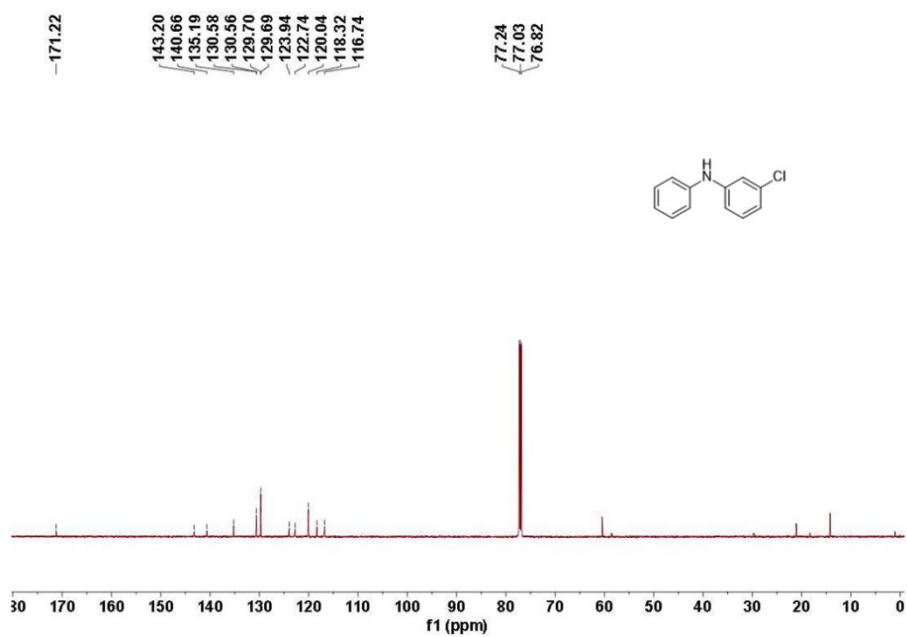

Figure S21 <sup>13</sup>C NMR spectrum of product 3g (entry 7) in CDCl<sub>3</sub>.

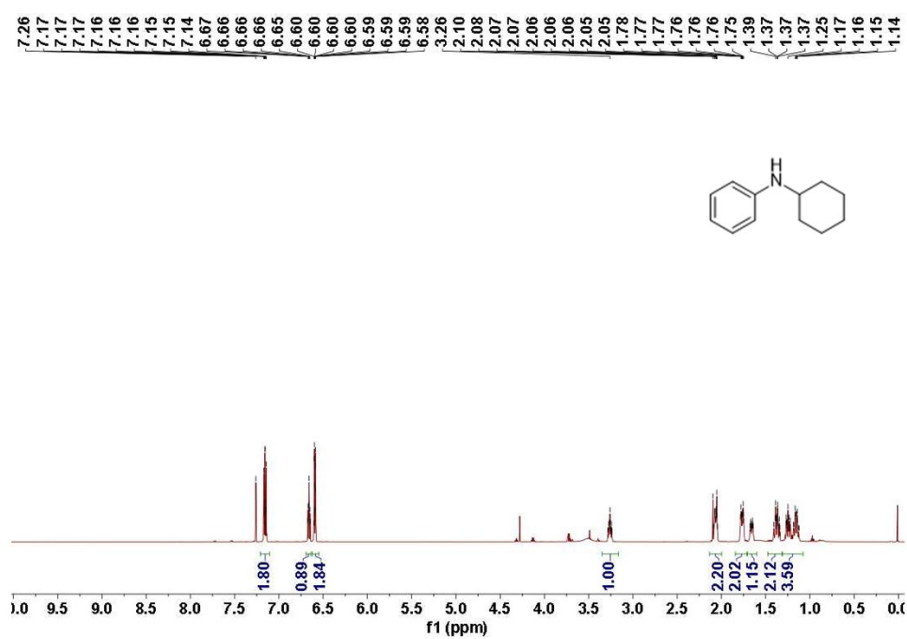

Figure S22 <sup>1</sup>H NMR spectrum of product 3h (entry 8) in CDCl<sub>3</sub>.

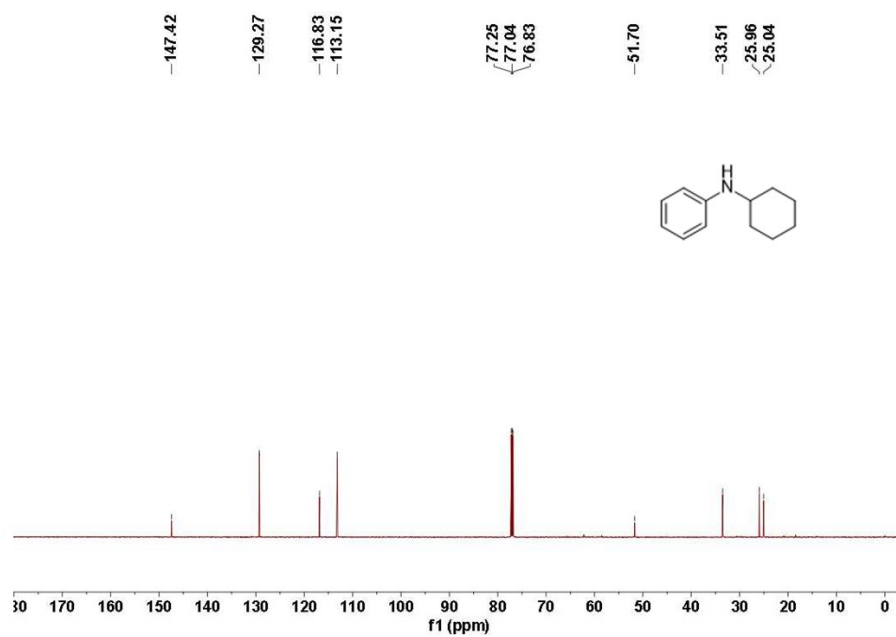

Figure S23  $^{13}\text{C}$  NMR spectrum of product 3h (entry 8) in  $\text{CDCl}_3$ .
